# Supplementary material
Source: ML conference proceedings conference paper supplement (https://openreview.net/forum?id=ZaOG6ci_IP7)
Supplement: supplementary_material [file attachment]

## Sheet: Sheet1
MNIST
kwidth	16	32	48	64	CNN
train acc	0.987	0.996	0.999	0.999	0.948
test acc	0.888	0.913	0.925	0.926	0.951
CIFAR
kwidth	16	32	48	64	CNN
train acc	0.965	0.993	0.998	0.999	0.861
test acc	0.681	0.722	0.721	0.722	0.776
